# Supplementary material for: Disclosing pathogenic genetic variants to research participants: Quantifying an emerging ethical responsibility
Source: HighWire-hosted journal article supplement (doi:10.1101/gr.127845.111), 2011-12-06
Supplement: Supporting_Online_Materials.pdf [file Supporting_Online_Materials.pdf]

## Supporting Online Materials

**Supporting Online Materials Table 1:**

| Categories                          | Characteristics                                    | Scoring method                                                        | Description                                                                                                                                                            |
|-------------------------------------|----------------------------------------------------|-----------------------------------------------------------------------|------------------------------------------------------------------------------------------------------------------------------------------------------------------------|
| <b>Clinical Impact of Phenotype</b> | <b>Age of onset:</b>                               | Prenatal, 0-2, 3-7, 8-13, 14-18, 19-30, 31-50, 50+                    | Age or age range during which phenotype presents and/or begins to have impact on individual's health                                                                   |
|                                     | <b>Severity with treatment</b>                     | Scored on a Likert scale, ranged 1 to 5, low to high                  | Phenotypic severity after treatment (if available), considering impact on day to day life and longterm morbidity and risk                                              |
|                                     | <b>Severity without treatment</b>                  | Scored on a Likert scale, ranged 1 to 5, low to high                  | Phenotypic severity before or without any treatment, considering impact on day to day life and longterm morbidity and risk                                             |
|                                     | <b>Reproductive issues:</b>                        | No impact                                                             | Possible reproductive considerations resulting from phenotype                                                                                                          |
|                                     |                                                    | Physical or medical problem(s) directly affecting reproduction        |                                                                                                                                                                        |
|                                     |                                                    | Decreased reproductive fitness based on lifespan issues               |                                                                                                                                                                        |
|                                     |                                                    | Decreased reproductive fitness based on physical or mental disability |                                                                                                                                                                        |
| <b>Clinical Actionability</b>       | <b>Efficacy</b>                                    | Scored on a Likert scale, ranged 1 to 5, low to high                  | How effective are available treatments and interventions, how much can these interventions alleviate or prevent symptoms/presentations of the condition                |
|                                     | <b>Invasiveness/Challenge</b>                      | Scored on a Likert scale, ranged 1 to 5, low to high                  | How physically invasive are available interventions, how much risk is involved, how challenging might these interventions be (physically, emotionally, socially, etc.) |
|                                     | <b>Frequency/Duration</b>                          | Scored on a Likert scale, ranged 1 to 5, low to high                  | How often must an affected individual undertake treatments and interventions or engage in management behaviors                                                         |
|                                     | <b>Medical benefit of presymptomatic knowledge</b> | Scored on a Likert scale, ranged 1 to 3, low to high                  | If available, how beneficial are presymptomatic interventions, including screening and monitoring, prophylactics measures, etc.                                        |
|                                     | <b>Medical harm of presymptomatic knowledge</b>    | Scored on a Likert scale, ranged 1 to 3, low to high                  | If available, how potentially harmful are presymptomatic interventions, including screening and monitoring, prophylactics measures, etc.                               |
|                                     | <b>Comments</b>                                    | Standardized list of intervention types                               | Details concerning presymptomatic medical interventions                                                                                                                |
| <b>Association Validity</b>         | <b>Relative Risk</b>                               | Scored on a Likert scale, ranged 1 to 4, low to high                  | If available, what is the relative risk (or odds ratio) value for the association                                                                                      |
|                                     | <b>Validity</b>                                    | Scored on a Likert scale, ranged 1 to 3, low to high                  | How strong is the reported association, how likely is it that the variant is causative or a risk factor for the listed phenotype                                       |
|                                     | <b>Validity comments</b>                           | Free text field                                                       | Details concerning the validity score, including study factors and association data that contributed to validity score                                                 |

Supporting Online Materials Figure 1: The complete criteria used by the consensus group of expert by genetic counselors to annotate each sampled variant.

**Supporting Online Materials Table 2: Annotation scores for the 160 reviewed variants. Each row includes the phenotype of the reviewed variant, in addition to the severity of associated phenotype with and without treatment, as well as the validity of each phenotype-variant association.**

| Phenotype                                                                     | Severity without treatment | Severity with treatment | Change in Severity | Validity |
|-------------------------------------------------------------------------------|----------------------------|-------------------------|--------------------|----------|
| 22q11.2 deletion                                                              | 4                          | 3                       | 1                  | Low      |
| 22q11.2 deletion syndrome (VCFS)                                              | 4                          | 3                       | 1                  | Moderate |
| Acute intermittent porphyria                                                  | 3                          | 3                       | 0                  | Low      |
| AD Spastic paraplegia                                                         | 4                          | 4                       | 0                  | Low      |
| Agammaglobulinemia (XL)                                                       | 4                          | 3                       | 1                  | Low      |
| Age of natural menopause                                                      | 2                          | 1                       | 1                  | Unknown  |
| Alexander disease                                                             | 4                          | 4                       | 0                  | High     |
| Alport syndrome (XL)                                                          | 5                          | Variable                | Variable           | Low      |
| Altered nAChR function                                                        | Unknown                    | Unknown                 | Unknown            | Low      |
| Androgen sensitivity in prostate cancer cells as a result of somatic mutation | Unknown                    | Unknown                 | Unknown            | Low      |
| Aniridia                                                                      | 3                          | 2                       | 1                  | High     |
| Aniridia                                                                      | 3                          | 2                       | 1                  | Low      |
| Aniridia                                                                      | 3                          | 2                       | 1                  | Low      |
| Aplastic anemia                                                               | Variable                   | 3                       | Variable           | Low      |
| AR Polycystic kidney and hepatic disease                                      | 4                          | 3                       | 1                  | Low      |
| Association with myocardial infarction*                                       | 4                          | 4                       | 0                  | Low      |
| Ataxia telangiectasia                                                         | 4                          | 4                       | 0                  | High     |
| Autosomal recessive deafness                                                  | 1                          | 1                       | 0                  | High     |
| Autosomal recessive osteopetrosis                                             | 5                          | 4                       | 1                  | Moderate |
| Bardet-Biedl syndrome                                                         | 3                          | 3                       | 0                  | Low      |
| Beckwith-Wiedemann syndrome                                                   | 4                          | 3                       | 1                  | Moderate |
| Benign recurrent intrahepatic cholestasis                                     | 3                          | 3                       | 0                  | Low      |
| Beta thalassemia - Hb Korea                                                   | 2                          | 2                       | 0                  | Low      |
| Bethlem myopathy                                                              | 3                          | 3                       | 0                  | High     |
| Bifid nose, renal agenesis, and anorectal malformation syndrome (BNAR)        | Variable                   | Unknown                 | Unknown            | High     |

|                                                              |          |          |          |          |
|--------------------------------------------------------------|----------|----------|----------|----------|
| <b>Catecholaminergic polymorphic ventricular tachycardia</b> | 4        | 3        | 1        | Low      |
| <b>Central Core disease</b>                                  | Variable | Variable | Variable | High     |
| <b>Cerebral cavernous malformation type1</b>                 | 3        | 3        | 0        | High     |
| <b>Cerebral cavernous malformations</b>                      | 3        | 3        | 0        | Unknown  |
| <b>Charcot-Marie-Tooth disease 4C</b>                        | 4        | 4        | 0        | Low      |
| <b>Charcot-Marie-Tooth disease 4h</b>                        | 4        | 4        | 0        | Moderate |
| <b>Charcot-Marie-Tooth disease type 1b</b>                   | 4        | 4        | 0        | Moderate |
| <b>Chronic granulomatosis disease (AR)</b>                   | 4        | 3        | 1        | Moderate |
| <b>Colorectal cancer (NOS?)</b>                              | Unknown  | Unknown  | Unknown  | Unknown  |
| <b>Complement C7 deficiency</b>                              | 3        | 3        | 0        | Unknown  |
| <b>Complement C7 deficiency</b>                              | 3        | 3        | 0        | High     |
| <b>Congenital hypothyroidism</b>                             | 2        | 1        | 1        | Low      |
| <b>Congenital lipoid adrenal hyperplasia</b>                 | 5        | 1        | 4        | High     |
| <b>Coronary artery disease</b>                               | 4        | 4        | 0        | Moderate |
| <b>Currarino syndrome</b>                                    | 5        | 2        | 3        | High     |
| <b>Cystic fibrosis</b>                                       | 4        | 4        | 0        | Moderate |
| <b>Cystic fibrosis</b>                                       | 4        | 4        | 0        | Low      |
| <b>Cystic fibrosis</b>                                       | 4        | 4        | 0        | High     |
| <b>Cystinuria</b>                                            | 3        | 2        | 1        | Low      |
| <b>Duchenne muscular dystrophy</b>                           | 5        | 5        | 0        | Low      |
| <b>Dystrophic epidermolysis bullosa</b>                      | 5        | 5        | 0        | High     |
| <b>Early onset sarcoidosis</b>                               | 3        | 3        | 0        | Moderate |
| <b>Ectodermal dysplasia</b>                                  | 4        | 3        | 1        | Low      |
| <b>Ectopia lentis</b>                                        | 2        | 2        | 0        | Low      |
| <b>Emery Dreifuss muscular dystrophy</b>                     | 4        | 4        | 0        | High     |
| <b>Enhanced S Cone syndrome</b>                              | 2        | 2        | 0        | Moderate |
| <b>Epidermolysis bullosa simplex (Dowling-Meara type)</b>    | 4        | 3        | 1        | Unknown  |
| <b>Erythrokeratoderma variabilis</b>                         | 2        | 2        | 0        | Moderate |
| <b>Fabry disease</b>                                         | 5        | 4        | 1        | Low      |

|                                                      |          |          |          |          |
|------------------------------------------------------|----------|----------|----------|----------|
| <b>Factor XI deficiency (Hemophilia C)</b>           | 3        | 3        | 0        | High     |
| <b>Familial adenomatous polyposis</b>                | 5        | 3        | 2        | Moderate |
| <b>Familial adenomatous polyposis</b>                | 5        | 3        | 2        | Low      |
| <b>Familial adenomatous polyposis</b>                | 5        | 3        | 2        | Low      |
| <b>Familial intrahepatic cholestasis</b>             | 5        | 4        | 1        | Low      |
| <b>FAP (attenuated)</b>                              | 4        | 2        | 2        | Low      |
| <b>FAP (attenuated)</b>                              | 4        | 2        | 2        | High     |
| <b>Gastric cancer susceptibility</b>                 | 5        | 4        | 1        | Low      |
| <b>Gitelman syndrome</b>                             | 1        | 1        | 0        | Low      |
| <b>Glioma</b>                                        | Variable | Variable | Variable | Low      |
| <b>Glucose transporter 1 deficiency syndrome</b>     | 4        | 4        | 0        | Moderate |
| <b>Glucose-6-phosphate dehydrogenase deficiency</b>  | 3        | 3        | 0        | Low      |
| <b>Glucosephosphate isomerase deficiency</b>         | 3        | 3        | 0        | Moderate |
| <b>H-antigen deficiency (Bombay)</b>                 | 1        | 1        | 0        | Moderate |
| <b>Harlequin Ichthyosis</b>                          | 5        | 4        | 1        | Moderate |
| <b>Harlequin ichthyosis (AR)</b>                     | 5        | 4        | 1        | Moderate |
| <b>Hemoglobin Tacoma</b>                             | 1        | 1        | 0        | High     |
| <b>Hereditary angioedema</b>                         | 3        | 3        | 0        | Moderate |
| <b>Hereditary angioedema</b>                         | 3        | 3        | 0        | Low      |
| <b>Hereditary Breast and Ovarian Cancer syndrome</b> | 5        | 3        | 2        | High     |
| <b>Hereditary Breast and Ovarian Cancer syndrome</b> | 5        | 3        | 2        | High     |
| <b>Hereditary Breast and Ovarian Cancer syndrome</b> | 5        | 3        | 2        | Low      |
| <b>Hereditary Breast and Ovarian Cancer syndrome</b> | 5        | 3        | 2        | Moderate |
| <b>Hereditary hemorrhagic telangiectasia</b>         | 3        | 3        | 0        | High     |
| <b>Hereditary Hemorrhagic Telangiectasia</b>         | 3        | 3        | 0        | High     |
| <b>Hereditary Spastic Paraplegia</b>                 | 4        | 3        | 1        | Moderate |
| <b>Hirschsprung disease</b>                          | 4        | 2        | 2        | Moderate |

|                                                                  |          |          |          |          |
|------------------------------------------------------------------|----------|----------|----------|----------|
| <b>Hirschsprung disease</b>                                      | 4        | 2        | 2        | Low      |
| <b>HLA-B null allele</b>                                         | 1        | 1        | 0        | Moderate |
| <b>HNPCC</b>                                                     | 5        | 4        | 1        | Low      |
| <b>Homocystinuria cblD type</b>                                  | 4        | 3        | 1        | Moderate |
| <b>Hypercholesterolemia</b>                                      | Variable | 3        | Variable | Low      |
| <b>Hypercholesterolemia</b>                                      | Variable | 3        | Variable | Low      |
| <b>Hypercholesterolemia</b>                                      | Variable | 3        | Variable | High     |
| <b>Hypertension (essential)</b>                                  | 3        | 2        | 1        | Low      |
| <b>Hypoprothrombinemia</b>                                       | 3        | 3        | 0        | Moderate |
| <b>Incomplete congenital stationary night blindness (type 2)</b> | 1        | 1        | 0        | Low      |
| <b>Increased risk for type II diabetes</b>                       | 4        | 2        | 2        | High     |
| <b>Juvenile intestinal polyposis</b>                             | 4        | 3        | 1        | Low      |
| <b>Limb Girdle muscular dystrophy type 2a</b>                    | 3        | 3        | 0        | Low      |
| <b>Long QT syndrome</b>                                          | 4        | 2        | 2        | Low      |
| <b>Macular corneal dystrophy type 1</b>                          | 3        | 3        | 0        | Low      |
| <b>Marfan syndrome</b>                                           | 4        | 4        | 0        | Low      |
| <b>Marinesco-Sjogren syndrome</b>                                | 4        | 4        | 0        | High     |
| <b>Maturity onset diabetes of the young (MODY) type II</b>       | Variable | 1        | Variable | Low      |
| <b>Maturity onset diabetes of the young (MODY) type III</b>      | Variable | 1        | Variable | High     |
| <b>Modifier of risk for obesity</b>                              | 3        | 1        | 2        | Low      |
| <b>Molybdenum cofactor deficiency</b>                            | 5        | Unknown  | Unknown  | Unknown  |
| <b>MPS II - Hunter syndrome</b>                                  | Variable | Variable | Variable | Low      |
| <b>Mucopolidosis type 2 (I-cell disease)</b>                     | 5        | 5        | 0        | High     |
| <b>Multiple endocrine neoplasia type 1</b>                       | 4        | 3        | 1        | Low      |
| <b>Multiple epiphyseal dysplasia</b>                             | 3        | 3        | 0        | Low      |
| <b>Nemaline myopathy</b>                                         | Variable | Variable | Variable | High     |
| <b>Nephrogenic diabetes insipidus</b>                            | 4        | 2        | 2        | Low      |
| <b>Nephropathic cystinosis</b>                                   | 5        | 4        | 1        | High     |

|                                                  |          |          |          |          |
|--------------------------------------------------|----------|----------|----------|----------|
| <b>Neurofibromatosis type 1 (NF1)</b>            | Variable | Variable | Variable | High     |
| <b>Neurofibromatosis type 1 (NF1)</b>            | Variable | Variable | Variable | Moderate |
| <b>Nevoid basal cell carcinoma</b>               | 5        | 3        | 2        | Moderate |
| <b>Niemann-Pick disease type A</b>               | 5        | 5        | 0        | High     |
| <b>Niemann-Pick type C</b>                       | 5        | 5        | 0        | Moderate |
| <b>Nocturnal asthma</b>                          | 3        | 2        | 1        | High     |
| <b>Oculocutaneous albinism type 1A</b>           | 2        | 1        | 1        | Unknown  |
| <b>Oculocutaneous albinism, type 1A</b>          | 2        | 1        | 1        | Unknown  |
| <b>Oral white sponge nevus</b>                   | 1        | 1        | 0        | Moderate |
| <b>Ornithine transcarbamylase deficiency</b>     | 5        | 2        | 3        | Low      |
| <b>Osteogenesis imperfecta</b>                   | 4        | 4        | 0        | Moderate |
| <b>Osteoporosis</b>                              | 3        | 2        | 1        | Moderate |
| <b>PKU (phenylketonuria)</b>                     | 5        | 1        | 4        | High     |
| <b>Polycystic kidney disease 2</b>               | 5        | 4        | 1        | Moderate |
| <b>Polycystic kidney disease type 1 (AD)</b>     | 4        | 3        | 1        | Moderate |
| <b>Polymorphic ventricular tachycardia</b>       | 4        | 3        | 1        | Moderate |
| <b>Primary congenital glaucoma</b>               | 4        | 2        | 2        | Moderate |
| <b>Primary open-angle glaucoma</b>               | 3        | 1        | 2        | Low      |
| <b>Progressive external ophthalmoplegia</b>      | Variable | Variable | Variable | Moderate |
| <b>Properdin deficiency</b>                      | 4        | 1        | 3        | Moderate |
| <b>Protein S deficiency</b>                      | 3        | 2        | 1        | Low      |
| <b>Protoporphyria</b>                            | 3        | 3        | 0        | Unknown  |
| <b>Pulmonary hyptertension</b>                   | Unknown  | Unknown  | Unknown  | Low      |
| <b>Renal glucosuria</b>                          | 1        | 1        | 0        | Low      |
| <b>Retinitis Pigmentosa - autosomal dominant</b> | 2        | 2        | 0        | Low      |
| <b>Retinol deficiency</b>                        | 2        | Unknown  | Unknown  | Moderate |
| <b>Retinoschisis</b>                             | 2        | 2        | 0        | Moderate |
| <b>Rett syndrome</b>                             | 5        | 5        | 0        | Moderate |
| <b>Rett syndrome</b>                             | 5        | 5        | 0        | Low      |
| <b>Rett syndrome</b>                             | 5        | 5        | 0        | High     |

|                                                            |          |          |          |          |
|------------------------------------------------------------|----------|----------|----------|----------|
| <b>Salla disease</b>                                       | 5        | 5        | 0        | High     |
| <b>Shprintzen-Goldberg syndrome (or related disorders)</b> | 4        | 4        | 0        | Moderate |
| <b>Slow channel myasthenic syndrome</b>                    | 3        | 3        | 0        | High     |
| <b>Spherocytosis</b>                                       | Variable | Variable | Variable | Low      |
| <b>Spondyloepiphyseal dysplasia</b>                        | 3        | 3        | 0        | High     |
| <b>Stargardt disease</b>                                   | 2        | 2        | 0        | Unknown  |
| <b>Susceptibility to TB</b>                                | 3        | 3        | 0        | Moderate |
| <b>Tropical pancreatitis</b>                               | 3        | 3        | 0        | Moderate |
| <b>Tuberous sclerosis</b>                                  | 4        | 4        | 0        | Moderate |
| <b>Tuberous sclerosis</b>                                  | 4        | 4        | 0        | Unknown  |
| <b>Tuberous sclerosis</b>                                  | 4        | 4        | 0        | Moderate |
| <b>Tyrosinemia type 1</b>                                  | 5        | 2        | 3        | High     |
| <b>Ullrich congenital muscular dystrophy</b>               | 4        | 4        | 0        | Low      |
| <b>Variegate porphyria</b>                                 | Variable | 3        | Variable | Low      |
| <b>Von Hippel-Lindau</b>                                   | 4        | 4        | 0        | Low      |
| <b>Walker Warburg syndrome</b>                             | 5        | 5        | 0        | Moderate |
| <b>Wilson disease</b>                                      | 4        | 2        | 2        | Moderate |
| <b>Wilson disease</b>                                      | 4        | 2        | 2        | Moderate |
| <b>Xeroderma pigmentosum (variant type)</b>                | 5        | 4        | 1        | Moderate |
| <b>XL lymphoproliferative syndrome</b>                     | 5        | 4        | 1        | Moderate |
| <b>XL SCID (severe combined immunodeficiency)</b>          | 5        | 2        | 3        | Moderate |
